# Supplementary material for: Prediction of neutral noble gas insertion compounds with heavier pnictides: FNgY (Ng = Kr and Xe; Y = As, Sb and Bi)
Source: Royal Society of Chemistry journal article supplement (doi:10.1039/c6cp01338d), 2016-01-01
Supplement: c6cp01338d1.pdf [file c6cp01338d1.pdf]

## Electronic Supplementary Information

### Prediction of Neutral Noble Gas Insertion Compounds with Heavier Pnictides: FNgY (Ng = Kr and Xe; Y = As, Sb and Bi)

Ayan Ghosh, Debashree Manna, and Tapan K. Ghanty

#### List of Tables:

**Table S1.** Optimized Structural Parameters (Bond Length, R In Å, Bond Angle,  $\theta$  in Degree) for Minima (Min) of  ${}^3\text{FNgY}$  (Ng = Kr and Xe; Y = As, Sb and Bi) Compounds by B3LYP, MP2, CCSD(T) and MRCI Based Methods with B1, B2, and B3 Basis sets.

**Table S2.** Optimized Structural Parameters (Bond Length, R In Å, Bond Angle,  $\theta$  in Degree) for Transition States (TS) of  ${}^3\text{FNgY}$  (Ng = Kr and Xe; Y = As, Sb and Bi) Compounds by B3LYP, MP2, CCSD(T) and MRCI Based Methods with B1, B2, and B3 Basis sets.

**Table S3.** Harmonic Vibrational Frequencies (in  $\text{cm}^{-1}$ ) Calculated Using B3LYP, MP2 and CCSD(T) Based Methods Using B1 and B2 Basis sets for  ${}^3\text{FNgY}$  (Ng = Kr and Xe; Y = As, Sb and Bi) Compounds. Corresponding IR Intensity Values are Given within the Parentheses (in  $\text{km mol}^{-1}$ ).

**Table S4.** B3LYP and MP2 Calculated Values of the Harmonic Vibrational Frequencies (in  $\text{cm}^{-1}$ ) and Intrinsic Force Constants in the Parentheses (in  $\text{N m}^{-1}$ ) Corresponding to Individual Internal Coordinates in the  ${}^3\text{FNgY}$  (Ng = Kr and Xe; Y = As, Sb and Bi) Using B1 and B2 Basis sets.

**Table S5.** Energies (in  $\text{kJ mol}^{-1}$ ) of the Various Dissociated Species Relative to the  ${}^3\text{FNgY}$  (Ng = Kr and Xe; Y = As, Sb and Bi) Calculated Using B3LYP, MP2, CCSD(T) and MRCI Based Methods Using B1, B2, B3 and B4<sup>a</sup> Basis sets.

**Table S6.** B3LYP and MP2 Calculated Values of the Mulliken Atomic Charges (in au) in  ${}^3\text{FNgY}$  (Ng = Kr and Xe; Y = As, Sb and Bi) Using B1 and B2 Basis sets.

**Table S7.** MP2 (B3LYP) Calculated Values (in au) of the BCP Properties of the F–Ng and Ng–Y Bonds in  ${}^3\text{FNgY}$  (Ng = Kr and Xe; Y = As, Sb and Bi) Compounds with B1 Basis Sets for FNgAs and FNgSb Molecules and B2 Basis Sets for FNgBi Molecules.

**Table S8.** Various Topological Properties at the Local Energy Density Critical Points [(3,+1) HCP] for the FNgY (Ng = Kr and Xe; Y = As, Sb and Bi) Ions Calculated Using the B3LYP and MP2 Methods with B1 Basis Sets for FNgAs and FNgSb Molecules and B2 Basis Sets for FNgBi Molecules.

**Table S1. Optimized Structural Parameters (Bond Length, R In Å, Bond Angle,  $\theta$  in Degree) for Minima (Min) of  $^3\text{FNgY}$  (Ng = Kr and Xe; Y = As, Sb and Bi) Compounds by B3LYP, MP2, CCSD(T) and MRCI Based Methods with B1, B2, and B3 Basis sets.**

| Bond                               | Methods           | FKrAs | FKrSb | FKrBi            | FXeAs | FXeSb | FXeBi            |
|------------------------------------|-------------------|-------|-------|------------------|-------|-------|------------------|
| <b>R(F-Ng)</b>                     | <b>B3LYP/B1</b>   | 2.144 | 2.184 | ... <sup>a</sup> | 2.198 | 2.227 | ... <sup>a</sup> |
|                                    | <b>B3LYP/B2</b>   | 2.150 | 2.196 | 2.220            | 2.197 | 2.229 | 2.244            |
|                                    | <b>MP2/B1</b>     | 2.078 | 2.117 | ... <sup>a</sup> | 2.152 | 2.176 | ... <sup>a</sup> |
|                                    | <b>MP2/B2</b>     | 2.085 | 2.130 | 2.158            | 2.158 | 2.186 | 2.212            |
|                                    | <b>CCSD(T)/B1</b> | 2.119 | 2.152 | 2.177            | 2.165 | 2.190 | 2.217            |
|                                    | <b>CCSD(T)/B3</b> | 2.132 | 2.162 | 2.181            | 2.193 | 2.218 | 2.229            |
|                                    | <b>MRCI/B3</b>    | 2.054 | 2.094 | 2.113            | 2.165 | 2.180 | 2.192            |
| <b>R(Ng-Y)</b>                     | <b>B3LYP/B1</b>   | 2.545 | 2.749 | ... <sup>a</sup> | 2.701 | 2.907 | ... <sup>a</sup> |
|                                    | <b>B3LYP/B2</b>   | 2.550 | 2.755 | 2.839            | 2.698 | 2.907 | 2.978            |
|                                    | <b>MP2/B1</b>     | 2.490 | 2.683 | ... <sup>a</sup> | 2.656 | 2.859 | ... <sup>a</sup> |
|                                    | <b>MP2/B2</b>     | 2.489 | 2.683 | 2.766            | 2.650 | 2.857 | 2.939            |
|                                    | <b>CCSD(T)/B1</b> | 2.597 | 2.788 | 2.882            | 2.698 | 2.903 | 2.994            |
|                                    | <b>CCSD(T)/B3</b> | 2.627 | 2.768 | 2.860            | 2.752 | 2.922 | 3.001            |
|                                    | <b>MRCI/B3</b>    | 2.563 | 2.680 | 2.741            | 2.772 | 2.945 | 3.021            |
| <b><math>\theta</math>(F-Ng-Y)</b> | <b>B3LYP/B1</b>   | 180.0 | 180.0 | ... <sup>a</sup> | 180.0 | 180.0 | ... <sup>a</sup> |
|                                    | <b>B3LYP/B2</b>   | 180.0 | 180.0 | 180.0            | 180.0 | 180.0 | 180.0            |
|                                    | <b>MP2/B1</b>     | 180.0 | 180.0 | ... <sup>a</sup> | 180.0 | 180.0 | ... <sup>a</sup> |
|                                    | <b>MP2/B2</b>     | 180.0 | 180.0 | 180.0            | 180.0 | 180.0 | 180.0            |
|                                    | <b>CCSD(T)/B1</b> | 180.0 | 180.0 | 180.0            | 180.0 | 180.0 | 180.0            |
|                                    | <b>CCSD(T)/B3</b> | 180.0 | 180.0 | 180.0            | 180.0 | 180.0 | 180.0            |
|                                    | <b>MRCI/B3</b>    | 180.0 | 180.0 | 180.0            | 180.0 | 180.0 | 180.0            |

<sup>a</sup>Calculations for Bi-containing species could not be performed using B1 basis sets (aug-cc-pVTZ-PP) in the GAMESS software where ECP integrals are limited up to core potentials corresponding to the  $g$  angular momentum.

**Table S2. Optimized Structural Parameters (Bond Length, R In Å, Bond Angle,  $\theta$  in Degree) for Transition States (TS) of  $^3\text{FNgY}$  (Ng = Kr and Xe; Y = As, Sb and Bi) Compounds by B3LYP, MP2, CCSD(T) and MRCI Based Methods with B1, B2, and B3 Basis sets.**

| Bond                               | Methods           | FKrAs | FKrSb | FKrBi            | FXeAs | FXeSb | FXeBi            |
|------------------------------------|-------------------|-------|-------|------------------|-------|-------|------------------|
| <b>R(F-Rg)</b>                     | <b>B3LYP/B1</b>   | 2.448 | 2.459 | ... <sup>a</sup> | 2.442 | 2.477 | ... <sup>a</sup> |
|                                    | <b>B3LYP/B2</b>   | 2.464 | 2.478 | 2.485            | 2.450 | 2.477 | 2.494            |
|                                    | <b>MP2/B1</b>     | 2.358 | 2.378 | ... <sup>a</sup> | 2.403 | 2.432 | ... <sup>a</sup> |
|                                    | <b>MP2/B2</b>     | 2.372 | 2.397 | 2.414            | 2.421 | 2.453 | 2.473            |
|                                    | <b>CCSD(T)/B1</b> | 2.359 | 2.383 | 2.402            | 2.396 | 2.428 | 2.449            |
|                                    | <b>CCSD(T)/B3</b> | 2.374 | 2.390 | 2.405            | 2.429 | 2.452 | 2.467            |
|                                    | <b>MRCI/B3</b>    | 2.377 | 2.391 | 2.400            | 2.442 | 2.462 | 2.476            |
| <b>R(Ng-Y)</b>                     | <b>B3LYP/B1</b>   | 2.486 | 2.700 | ... <sup>a</sup> | 2.598 | 2.819 | ... <sup>a</sup> |
|                                    | <b>B3LYP/B2</b>   | 2.490 | 2.706 | 2.797            | 2.596 | 2.813 | 2.904            |
|                                    | <b>MP2/B1</b>     | 2.394 | 2.612 | ... <sup>a</sup> | 2.552 | 2.768 | ... <sup>a</sup> |
|                                    | <b>MP2/B2</b>     | 2.398 | 2.617 | 2.716            | 2.545 | 2.768 | 2.865            |
|                                    | <b>CCSD(T)/B1</b> | 2.416 | 2.636 | 2.747            | 2.563 | 2.781 | 2.880            |
|                                    | <b>CCSD(T)/B3</b> | 2.462 | 2.654 | 2.742            | 2.618 | 2.808 | 2.894            |
|                                    | <b>MRCI/B3</b>    | 2.454 | 2.645 | 2.721            | 2.623 | 2.813 | 2.893            |
| <b><math>\theta</math>(F-Ng-Y)</b> | <b>B3LYP/B1</b>   | 100.8 | 104.8 | ... <sup>a</sup> | 94.4  | 96.9  | ... <sup>a</sup> |
|                                    | <b>B3LYP/B2</b>   | 100.9 | 105.2 | 107.6            | 94.0  | 97.1  | 98.4             |
|                                    | <b>MP2/B1</b>     | 107.5 | 111.6 | ... <sup>a</sup> | 101.0 | 103.5 | ... <sup>a</sup> |
|                                    | <b>MP2/B2</b>     | 108.1 | 112.2 | 114.9            | 101.3 | 103.7 | 105.3            |
|                                    | <b>CCSD(T)/B1</b> | 103.8 | 107.5 | 109.0            | 99.4  | 101.5 | 102.7            |
|                                    | <b>CCSD(T)/B3</b> | 105.4 | 109.0 | 110.0            | 101.3 | 103.2 | 103.6            |
|                                    | <b>MRCI/B3</b>    | 108.5 | 112.5 | 115.4            | 102.3 | 104.5 | 105.7            |

<sup>a</sup>Calculations for Bi-containing species could not be performed using B1 basis sets (aug-cc-pVTZ-PP) in the GAMESS software where ECP integrals are limited up to core potentials corresponding to the  $g$  angular momentum.

**Table S3. Harmonic Vibrational Frequencies (in  $\text{cm}^{-1}$ ) Calculated Using B3LYP, MP2 and CCSD(T) Based Methods Using B1 and B2 Basis sets for  $^3\text{FNgY}$  (Ng = Kr and Xe; Y = As, Sb and Bi) Compounds. Corresponding IR Intensity Values are Given within the Parentheses (in  $\text{km mol}^{-1}$ ).**

| Species | State | Normal Modes             | B3LYP/B1         | B3LYP/B2      | MP2/B1           | MP2/B2        | CCSD(T)/B1 |
|---------|-------|--------------------------|------------------|---------------|------------------|---------------|------------|
| FKrAs   | Min   | F-Ng Str.                | 378.2 (199.2)    | 374.8 (196.2) | 417.5 (425.9)    | 408.9 (428.7) | 398.3      |
|         |       | Ng-Y Str.                | 185.1 (4.9)      | 183.1 (4.7)   | 207.2 (2.0)      | 207.9 (1.8)   | 134.7      |
|         |       | F-Ng-Y Bend <sup>a</sup> | 101.5 (8.1)      | 105.8 (8.3)   | 119.2 (9.0)      | 121.6 (9.4)   | 106.7      |
|         | TS    | F-Ng Str.                | 247.8 (20.7)     | 243.0 (19.4)  | 316.7 (95.3)     | 312.2 (88.1)  | 311.6      |
|         |       | Ng-Y Str.                | 177.2 (2.1)      | 172.9 (1.8)   | 241.3 (84.4)     | 239.5 (91.6)  | 230.4      |
|         |       | F-Ng-Y Bend              | -89.6 (6.4)      | -87.4 (5.8)   | -115.0 (10.4)    | -114.3 (10.6) | -126.6     |
| FKrSb   | Min   | F-Ng Str.                | 354.7 (198.6)    | 349.5 (193.5) | 384.8 (513.6)    | 372.8 (521.7) | 376.7      |
|         |       | Ng-Y Str.                | 151.6 (5.6)      | 148.9 (5.3)   | 175.9 (0.01)     | 174.3 (0.005) | 118.9      |
|         |       | F-Ng-Y Bend <sup>a</sup> | 87.0 (8.6)       | 91.1 (8.6)    | 103.3 (10.0)     | 103.8 (10.2)  | 94.6       |
|         | TS    | F-Ng Str.                | 236.3 (17.4)     | 229.5 ()      | 299.6 (122.2)    | 292.2 (118.4) | 296.4      |
|         |       | Ng-Y Str.                | 148.3 (1.7)      | 143.9 ()      | 196.7 (57.5)     | 192.3 (58.4)  | 185.8      |
|         |       | F-Ng-Y Bend              | -86.3 (10.7)     | -79.6 ()      | -102.3 (11.1)    | -101.0 (11.4) | -112.8     |
| FKrBi   | Min   | F-Ng Str.                | ... <sup>b</sup> | 337.1 (187.0) | ... <sup>b</sup> | 355.4 (565.3) | 364.8      |
|         |       | Ng-Y Str.                | ... <sup>b</sup> | 130.8 (4.7)   | ... <sup>b</sup> | 156.9 (0.7)   | 108.4      |
|         |       | F-Ng-Y Bend <sup>a</sup> | ... <sup>b</sup> | 84.6 (8.7)    | ... <sup>b</sup> | 94.7 (10.5)   | 87.7       |
|         | TS    | F-Ng Str.                | ... <sup>b</sup> | 221.2 (13.1)  | ... <sup>b</sup> | 282.3 (129.0) | 285.0      |
|         |       | Ng-Y Str.                | ... <sup>b</sup> | 128.2 (0.6)   | ... <sup>b</sup> | 168.1 (45.9)  | 162.0      |
|         |       | F-Ng-Y Bend              | ... <sup>b</sup> | -78.4 (12.9)  | ... <sup>b</sup> | -92.3 (12.4)  | -106.3     |
| FXeAs   | Min   | F-Ng Str.                | 380.3 (222.3)    | 377.2 (220.4) | 424.4 (320.1)    | 410.9 (318.1) | 407.2      |
|         |       | Ng-Y Str.                | 173.4 (1.1)      | 174.0 (1.2)   | 197.2 (0.03)     | 197.6 (0.01)  | 173.8      |
|         |       | F-Ng-Y Bend <sup>a</sup> | 95.7 (8.3)       | 105.6 (8.5)   | 110.7 (9.0)      | 111.5 (9.5)   | 105.1      |
|         | TS    | F-Ng Str.                | 261.4 (53.8)     | 256.3 (45.1)  | 303.9 (151.0)    | 298.7 (137.9) | 304.1      |
|         |       | Ng-Y Str.                | 197.7 (8.6)      | 195.6 (7.4)   | 225.7 (55.8)     | 228.1 (59.9)  | 221.9      |
|         |       | F-Ng-Y Bend              | -85.8 (4.2)      | -90.9 (4.0)   | -111.2 (8.3)     | -109.7 (9.0)  | -118.2     |

|       |     |                          |                  |               |                  |               |        |
|-------|-----|--------------------------|------------------|---------------|------------------|---------------|--------|
| FXeSb | Min | F-Ng Str.                | 360.4 (232.1)    | 355.9 (228.7) | 404.6 (380.8)    | 389.3 (382.3) | 407.2  |
|       |     | Ng-Y Str.                | 138.8 (1.5)      | 138.0 (1.5)   | 160.7 (0.1)      | 159.8 (0.1)   | 173.8  |
|       |     | F-Ng-Y Bend <sup>a</sup> | 84.1 (8.5)       | 94.5 (8.4)    | 99.6 (9.3)       | 99.5 (9.5)    | 105.1  |
|       | TS  | F-Ng Str.                | 248.7 (49.0)     | 252.5 (53.6)  | 290.8 (160.6)    | 283.7 (153.6) | 304.1  |
|       |     | Ng-Y Str.                | 153.6 (4.2)      | 154.9 (5.0)   | 181.1 (36.3)     | 178.9 (36.8)  | 221.9  |
|       |     | F-Ng-Y Bend              | -85.7 (5.3)      | -85.1 (6.0)   | -101.5 (8.9)     | -100.5 (9.4)  | -118.2 |
| FXeBi | Min | F-Ng Str.                | ... <sup>b</sup> | 350.3 (252.2) | ... <sup>b</sup> | 474.2 (588.9) | 465.1  |
|       |     | Ng-Y Str.                | ... <sup>b</sup> | 124.4 (2.1)   | ... <sup>b</sup> | 138.4 (0.02)  | 122.8  |
|       |     | F-Ng-Y Bend <sup>a</sup> | ... <sup>b</sup> | 89.8 (8.7)    | ... <sup>b</sup> | 92.1 (9.4)    | 87.1   |
|       | TS  | F-Ng Str.                | ... <sup>b</sup> | 243.1 (53.7)  | ... <sup>b</sup> | 275.1 (158.7) | 285.3  |
|       |     | Ng-Y Str.                | ... <sup>b</sup> | 131.8 (3.0)   | ... <sup>b</sup> | 150.8 (25.7)  | 150.6  |
|       |     | F-Ng-Y Bend              | ... <sup>b</sup> | -80.6 (7.2)   | ... <sup>b</sup> | -94.5 (10.0)  | -99.6  |

<sup>a</sup>It is doubly degenerate mode for minima energy structure

<sup>b</sup>Calculations for Bi-containing species could not be performed using B1 basis sets (aug-cc-pVTZ-PP) in the GAMESS software where ECP integrals are limited up to core potentials corresponding to the *g* angular momentum.

**Table S4. B3LYP and MP2 Calculated Values of the Harmonic Vibrational Frequencies (in  $\text{cm}^{-1}$ ) and Intrinsic Force Constants in the Parentheses (in  $\text{N m}^{-1}$ ) Corresponding to Individual Internal Coordinates in the  $^3\text{FNgY}$  (Ng = Kr and Xe; Y = As, Sb and Bi) Using B1 and B2 Basis sets.**

| Internal Coordinates     | Methods  | FKrAs            | FKrSb            | FKrBi            | FXeAs            | FXeSb            | FXeBi            |
|--------------------------|----------|------------------|------------------|------------------|------------------|------------------|------------------|
| F-Ng stretch             | B3LYP/B1 | 368.3<br>(123.8) | 345.9<br>(109.1) | ... <sup>b</sup> | 376.8<br>(138.9) | 357.1<br>(124.7) | ... <sup>b</sup> |
|                          | B3LYP/B2 | 364.8<br>(121.4) | 340.6<br>(105.9) | 328.7<br>(98.6)  | 373.7<br>(136.7) | 352.5<br>(121.6) | 347.6<br>(118.2) |
|                          | MP2/B1   | 415.3<br>(157.4) | 382.4<br>(133.4) | ... <sup>b</sup> | 423.4<br>(175.5) | 403.7<br>(159.4) | ... <sup>b</sup> |
|                          | MP2/B2   | 406.6<br>(150.9) | 370.3<br>(125.2) | 352.3<br>(113.3) | 409.8<br>(164.3) | 388.4<br>(147.6) | 474.9<br>(220.6) |
| Ng-Y stretch             | B3LYP/B1 | 203.9<br>(97.0)  | 170.6<br>(85.0)  | ... <sup>b</sup> | 180.8<br>(92.0)  | 147.2<br>(80.5)  | ... <sup>b</sup> |
|                          | B3LYP/B2 | 202.3<br>(95.4)  | 168.1<br>(82.5)  | 150.7<br>(80.0)  | 181.4<br>(92.6)  | 146.4<br>(79.7)  | 131.7<br>(82.7)  |
|                          | MP2/B1   | 211.6<br>(104.5) | 181.1<br>(95.8)  | ... <sup>b</sup> | 199.3<br>(111.8) | 163.0<br>(98.7)  | ... <sup>b</sup> |
|                          | MP2/B2   | 212.4<br>(105.2) | 179.4<br>(93.9)  | 163.6<br>(94.5)  | 200.0<br>(112.6) | 162.0<br>(97.6)  | 135.8<br>(88.0)  |
| F-Ng-Y bend <sup>a</sup> | B3LYP/B1 | 101.5            | 87.0             | ... <sup>b</sup> | 95.7             | 84.1             | ... <sup>b</sup> |
|                          | B3LYP/B2 | 105.8            | 91.1             | 84.6             | 105.6            | 94.5             | 89.8             |
|                          | MP2/B1   | 119.2            | 103.2            | ... <sup>b</sup> | 110.7            | 99.6             | ... <sup>b</sup> |
|                          | MP2/B2   | 121.6            | 103.8            | 94.7             | 111.5            | 99.5             | 92.1             |

<sup>a</sup>It is doubly degenerate mode for minima energy structure

<sup>b</sup>Calculations for Bi-containing species could not be performed using B1 basis sets (aug-cc-pVTZ-PP) in the GAMESS software where ECP integrals are limited up to core potentials corresponding to the *g* angular momentum.

**Table S5. Energies (in kJ mol<sup>-1</sup>) of the Various Dissociated Species Relative to the <sup>3</sup>FNgY (Ng = Kr and Xe; Y = As, Sb and Bi) Calculated Using B3LYP, MP2, CCSD(T) and MRCI Based Methods Using B1, B2, B3 and B4<sup>a</sup> Basis sets.**

| Channels                          | Channels No. | Methods    | FKrAs  | FKrSb  | FKrBi            | FXeAs  | FXeSb  | FXeBi            |
|-----------------------------------|--------------|------------|--------|--------|------------------|--------|--------|------------------|
| <sup>3</sup> FNgY                 |              | All        | 0.0    | 0.0    | 0.0              | 0.0    | 0.0    | 0.0              |
| Ng + <sup>3</sup> FY              | (1)          | B3LYP/B1   | -378.7 | -363.0 | ... <sup>b</sup> | -301.7 | -293.8 | ... <sup>b</sup> |
|                                   |              | B3LYP/B2   | -389.8 | -371.7 | -343.9           | -306.9 | -297.9 | -278.2           |
|                                   |              | MP2/B1     | -413.7 | -393.8 | ... <sup>b</sup> | -324.2 | -311.0 | ... <sup>b</sup> |
|                                   |              | MP2/B2     | -429.1 | -401.7 | -266.9           | -338.0 | -317.4 | -186.9           |
|                                   |              | CCSD(T)/B1 | -403.3 | -377.5 | -184.9           | -319.4 | -300.6 | -112.3           |
|                                   |              | CCSD(T)/B3 | -441.7 | -423.1 | -376.9           | -367.6 | -352.7 | -308.7           |
|                                   |              | CCSD(T)/B4 | -406.7 | -380.4 | -190.6           | -320.8 | -301.7 | -116.4           |
| <sup>2</sup> FNg + <sup>2</sup> Y | (2)          | B3LYP/B1   | 169.0  | 158.4  | ... <sup>b</sup> | 217.9  | 199.5  | ... <sup>b</sup> |
|                                   |              | B3LYP/B2   | 168.8  | 153.3  | 73.8             | 223.5  | 198.9  | 111.2            |
|                                   |              | MP2/B1     | 190.3  | 178.5  | ... <sup>b</sup> | 279.5  | 260.9  | ... <sup>b</sup> |
|                                   |              | MP2/B2     | 179.5  | 165.1  | 164.9            | 285.8  | 264.5  | 260.0            |
|                                   |              | CCSD(T)/B1 | 137.8  | 126.9  | 126.7            | 216.0  | 198.2  | 193.6            |
|                                   |              | CCSD(T)/B3 | ...    | ...    | 151.8            | ...    | ...    | 212.4            |
|                                   |              | CCSD(T)/B4 | 142.6  | 131.7  | 131.2            | 222.7  | 204.7  | 199.8            |
| <sup>2</sup> FNg + <sup>4</sup> Y | (3)          | B3LYP/B1   | 20.3   | 29.1   | ... <sup>b</sup> | 69.3   | 70.2   | ... <sup>b</sup> |
|                                   |              | B3LYP/B2   | 14.7   | 24.0   | 30.6             | 69.3   | 69.6   | 68.0             |
|                                   |              | MP2/B1     | -4.9   | 5.0    | ... <sup>b</sup> | 84.3   | 87.5   | ... <sup>b</sup> |
|                                   |              | MP2/B2     | -19.8  | -10.4  | -5.2             | 86.4   | 89.0   | 89.9             |
|                                   |              | CCSD(T)/B1 | -14.1  | -4.6   | 1.2              | 64.2   | 66.6   | 68.1             |
|                                   |              | CCSD(T)/B3 | -12.7  | 4.2    | 0.02             | 53.9   | 67.1   | 60.6             |
|                                   |              | CCSD(T)/B4 | -6.3   | 2.9    | 8.1              | 73.9   | 76.0   | 76.6             |
| <sup>2</sup> F + <sup>2</sup> NgY | (4)          | B3LYP/B1   | 172.2  | 167.2  | ... <sup>b</sup> | 235.2  | 227.0  | ... <sup>b</sup> |
|                                   |              | B3LYP/B2   | 164.5  | 159.1  | 159.5            | 232.8  | 223.5  | 217.2            |



|                                                      |            |                   |       |       |                  |       |       |                  |
|------------------------------------------------------|------------|-------------------|-------|-------|------------------|-------|-------|------------------|
|                                                      |            | <b>MP2/B1</b>     | 173.9 | 166.9 | ... <sup>b</sup> | 249.3 | 240.1 | ... <sup>b</sup> |
|                                                      |            | <b>MP2/B2</b>     | 164.6 | 155.1 | 155.6            | 242.6 | 230.6 | 227.2            |
|                                                      |            | <b>CCSD(T)/B1</b> | 137.4 | 126.8 | 126.9            | 214.0 | 200.9 | 197.5            |
|                                                      |            | <b>CCSD(T)/B3</b> | 162.4 | 164.3 | 152.0            | 235.6 | 233.2 | 219.4            |
|                                                      |            | <b>CCSD(T)/B4</b> | 141.2 | 130.7 | 130.3            | 217.5 | 204.3 | 200.7            |
| <b>F<sup>-</sup> + <sup>3</sup>[NgY]<sup>+</sup></b> | <b>(5)</b> | <b>B3LYP/B1</b>   | 548.4 | 505.9 | ... <sup>b</sup> | 585.2 | 545.0 | ... <sup>b</sup> |
|                                                      |            | <b>B3LYP/B2</b>   | 547.1 | 500.4 | 479.4            | 587.5 | 543.2 | 518.1            |
|                                                      |            | <b>MP2/B1</b>     | 524.5 | 474.5 | ... <sup>b</sup> | 569.0 | 523.5 | ... <sup>b</sup> |
|                                                      |            | <b>MP2/B2</b>     | 513.5 | 465.7 | 437.3            | 570.5 | 521.7 | 493.8            |
|                                                      |            | <b>CCSD(T)/B1</b> | 540.0 | 491.1 | 464.2            | 582.9 | 538.7 | 512.1            |
|                                                      |            | <b>CCSD(T)/B3</b> | 518.2 | 475.8 | 458.5            | 556.6 | 517.9 | 499.7            |
|                                                      |            | <b>CCSD(T)/B4</b> | 541.0 | 492.0 | 464.3            | 586.2 | 541.4 | 514.0            |
| <b>F<sup>-</sup> + <sup>1</sup>[NgY]<sup>+</sup></b> | <b>(6)</b> | <b>B3LYP/B1</b>   | 668.6 | 608.6 | ... <sup>b</sup> | 703.1 | 646.4 | ... <sup>b</sup> |
|                                                      |            | <b>B3LYP/B2</b>   | 679.5 | 616.6 | 589.9            | 715.4 | 656.5 | 626.4            |
|                                                      |            | <b>MP2/B1</b>     | 668.3 | 602.2 | ... <sup>b</sup> | 713.8 | 654.0 | ... <sup>b</sup> |
|                                                      |            | <b>MP2/B2</b>     | 663.1 | 594.7 | 563.2            | 709.8 | 647.9 | 617.5            |
|                                                      |            | <b>CCSD(T)/B1</b> | 652.1 | 586.5 | 554.6            | 582.9 | 634.4 | 603.1            |
|                                                      |            | <b>CCSD(T)/B3</b> | 651.6 | 593.4 | 568.4            | 690.5 | 636.5 | 609.6            |
|                                                      |            | <b>CCSD(T)/B4</b> | 651.1 | 585.7 | 553.5            | 695.6 | 635.3 | 603.6            |
| <b><sup>2</sup>F + Ng + <sup>2</sup>Y</b>            | <b>(7)</b> | <b>B3LYP/B1</b>   | 185.2 | 174.6 | ... <sup>b</sup> | 262.2 | 243.7 | ... <sup>b</sup> |
|                                                      |            | <b>B3LYP/B2</b>   | 183.4 | 167.9 | 88.4             | 266.3 | 241.7 | 154.1            |
|                                                      |            | <b>MP2/B1</b>     | 191.6 | 179.8 | ... <sup>b</sup> | 281.1 | 262.5 | ... <sup>b</sup> |
|                                                      |            | <b>MP2/B2</b>     | 180.8 | 166.4 | 166.2            | 271.9 | 250.6 | 246.1            |
|                                                      |            | <b>CCSD(T)/B1</b> | 139.5 | 128.6 | 128.4            | 223.4 | 205.5 | 201.0            |
|                                                      |            | <b>CCSD(T)/B3</b> | ...   | ...   | 152.4            | ...   | ...   | 220.5            |
|                                                      |            | <b>CCSD(T)/B4</b> | 144.4 | 133.6 | 133.1            | 230.3 | 212.3 | 207.3            |
| <b><sup>2</sup>F + Ng + <sup>4</sup>Y</b>            | <b>(8)</b> | <b>B3LYP/B1</b>   | 36.5  | 45.3  | ... <sup>b</sup> | 113.5 | 114.5 | ... <sup>b</sup> |
|                                                      |            | <b>B3LYP/B2</b>   | 29.3  | 38.6  | 45.2             | 112.2 | 112.4 | 110.9            |
|                                                      |            | <b>MP2/B1</b>     | -3.6  | 6.3   | ... <sup>b</sup> | 85.9  | 89.1  | ... <sup>b</sup> |
|                                                      |            | <b>MP2/B2</b>     | -18.5 | -9.2  | -3.9             | 72.5  | 75.1  | 76.0             |

|                              |  |                   |       |      |                  |       |      |                  |
|------------------------------|--|-------------------|-------|------|------------------|-------|------|------------------|
|                              |  | <b>CCSD(T)/B1</b> | -12.4 | -2.9 | 2.9              | 71.5  | 73.9 | 75.4             |
|                              |  | <b>CCSD(T)/B3</b> | -12.1 | 4.8  | 0.6              | 62.0  | 75.2 | 68.8             |
|                              |  | <b>CCSD(T)/B4</b> | -4.4  | 4.8  | 9.9              | 81.4  | 83.5 | 84.1             |
| <b><sup>3</sup>FNgY [TS]</b> |  | <b>B3LYP/B1</b>   | 72.3  | 59.0 | ... <sup>b</sup> | 102.7 | 85.4 | ... <sup>b</sup> |
|                              |  | <b>B3LYP/B2</b>   | 70.1  | 56.1 | 50.2             | 99.3  | 89.2 | 78.4             |
|                              |  | <b>MP2/B1</b>     | 83.7  | 60.7 | ... <sup>b</sup> | 107.7 | 93.8 | ... <sup>b</sup> |
|                              |  | <b>MP2/B2</b>     | 77.0  | 53.0 | 47.8             | 113.2 | 92.1 | 81.3             |
|                              |  | <b>CCSD(T)/B1</b> | 90.4  | 68.9 | 59.8             | 113.5 | 95.8 | 86.7             |
|                              |  | <b>CCSD(T)/B3</b> | 83.8  | 62.6 | 57.1             | 108.2 | 90.6 | 83.5             |
|                              |  | <b>CCSD(T)/B4</b> | 88.7  | 67.2 | 58.0             | 113.3 | 95.3 | 85.8             |
|                              |  | <b>MRCI/B3</b>    | 78.8  | 55.1 | 48.9             | 112.6 | 91.9 | 82.9             |

<sup>a</sup>aug-cc-pVQZ-PP (B4) Basis sets calculations are the single point energy calculations based on the optimized minima and transitions state structures as obtained by aug-cc-pVTZ-PP (B1)

<sup>b</sup>Calculations for Bi-containing species could not be performed using B1 basis sets (aug-cc-pVTZ-PP) in the GAMESS software where ECP integrals are limited up to core potentials corresponding to the *g* angular momentum.

**Table S6. B3LYP and MP2 Calculated Values of the Mulliken Atomic Charges (in au) in  $^3\text{FNgY}$  (Ng = Kr and Xe; Y = As, Sb and Bi) Using B1 and B2 Basis sets.**

| Species | Methods  | $q(\text{F})$    |                  | $q(\text{Ng})$   |                  | $q(\text{Y})$    |                  |
|---------|----------|------------------|------------------|------------------|------------------|------------------|------------------|
|         |          | Minima           | TS               | Minima           | TS               | Minima           | TS               |
| FKrAs   | B3LYP/B1 | -0.645           | -0.621           | 0.354            | 0.230            | 0.291            | 0.391            |
|         | B3LYP/B2 | -0.645           | -0.600           | 0.479            | 0.313            | 0.166            | 0.287            |
|         | MP2/B1   | -0.668           | -0.874           | 0.448            | 0.331            | 0.220            | 0.543            |
|         | MP2/B2   | -0.660           | -0.863           | 0.606            | 0.432            | 0.054            | 0.431            |
| FKrSb   | B3LYP/B1 | -0.654           | -0.651           | 0.252            | 0.135            | 0.402            | 0.516            |
|         | B3LYP/B2 | -0.672           | -0.633           | 0.395            | 0.273            | 0.277            | 0.360            |
|         | MP2/B1   | -0.698           | -0.881           | 0.313            | 0.178            | 0.385            | 0.703            |
|         | MP2/B2   | -0.709           | -0.878           | 0.509            | 0.362            | 0.200            | 0.517            |
| FKrBi   | B3LYP/B1 | ... <sup>a</sup> |
|         | B3LYP/B2 | -0.677           | -0.644           | 0.353            | 0.234            | 0.324            | 0.410            |
|         | MP2/B1   | ... <sup>a</sup> |
|         | MP2/B2   | -0.727           | -0.884           | 0.437            | 0.303            | 0.290            | 0.581            |
| FXeAs   | B3LYP/B1 | -0.673           | -0.686           | 0.626            | 0.483            | 0.047            | 0.203            |
|         | B3LYP/B2 | -0.631           | -0.645           | 0.579            | 0.467            | 0.052            | 0.178            |
|         | MP2/B1   | -0.702           | -0.830           | 0.653            | 0.485            | 0.049            | 0.345            |
|         | MP2/B2   | -0.649           | -0.816           | 0.666            | 0.554            | -0.016           | 0.262            |
| FXeSb   | B3LYP/B1 | -0.674           | -0.690           | 0.446            | 0.303            | 0.228            | 0.387            |
|         | B3LYP/B2 | -0.650           | -0.677           | 0.516            | 0.400            | 0.133            | 0.277            |
|         | MP2/B1   | -0.710           | -0.846           | 0.485            | 0.277            | 0.225            | 0.569            |
|         | MP2/B2   | -0.671           | -0.836           | 0.623            | 0.464            | 0.049            | 0.371            |
| FXeBi   | B3LYP/B1 | ... <sup>a</sup> |
|         | B3LYP/B2 | -0.663           | -0.683           | 0.470            | 0.343            | 0.193            | 0.340            |
|         | MP2/B1   | ... <sup>a</sup> |
|         | MP2/B2   | -0.687           | -0.844           | 0.544            | 0.386            | 0.142            | 0.457            |

<sup>a</sup>Calculations for Bi-containing species could not be performed using B1 basis sets (aug-cc-pVTZ-PP) in the GAMESS software where ECP integrals are limited up to core potentials corresponding to the  $g$  angular momentum.

**Table S7. MP2 (B3LYP) Calculated Values (in au) of the BCP Properties of the F–Ng and Ng–Y Bonds in <sup>3</sup>FNgY (Ng = Kr and Xe; Y = As, Sb and Bi) Compounds with B1 Basis Sets for FNgAs and FNgSb Molecules and B2 Basis Sets for FNgBi Molecules.**

| <b>F–Ng Bond</b> |                                      |                                              |                                     |                                                    |
|------------------|--------------------------------------|----------------------------------------------|-------------------------------------|----------------------------------------------------|
| <b>Complexes</b> | <b><math>\rho(\mathbf{r})</math></b> | <b><math>\nabla^2\rho(\mathbf{r})</math></b> | <b><math>E_d(\mathbf{r})</math></b> | <b><math>G(\mathbf{r})/\rho(\mathbf{r})</math></b> |
| F–Kr–As          | 0.092<br>(0.077)                     | 0.271<br>(0.259)                             | –0.022<br>(–0.009)                  | 0.975<br>(0.954)                                   |
| F–Kr–Sb          | 0.084<br>(0.071)                     | 0.267<br>(0.248)                             | –0.016<br>(–0.006)                  | 0.989<br>(0.958)                                   |
| F–Kr–Bi          | 0.077<br>(0.065)                     | 0.240<br>(0.222)                             | –0.014<br>(–0.007)                  | 0.961<br>(0.937)                                   |
| F–Xe–As          | 0.086<br>(0.082)                     | 0.231<br>(0.219)                             | –0.026<br>(–0.019)                  | 0.968<br>(0.900)                                   |
| F–Xe–Sb          | 0.087<br>(0.077)                     | 0.217<br>(0.215)                             | –0.026<br>(–0.016)                  | 0.926<br>(0.895)                                   |
| F–Xe–Bi          | 0.079<br>(0.074)                     | 0.200<br>(0.198)                             | –0.021<br>(–0.015)                  | 0.897<br>(0.876)                                   |
| <b>Ng–Y Bond</b> |                                      |                                              |                                     |                                                    |
| <b>Complexes</b> | <b><math>\rho(\mathbf{r})</math></b> | <b><math>\nabla^2\rho(\mathbf{r})</math></b> | <b><math>E_d(\mathbf{r})</math></b> | <b><math>G(\mathbf{r})/\rho(\mathbf{r})</math></b> |
| F–Kr–As          | 0.075<br>(0.067)                     | 0.014<br>(0.033)                             | –0.028<br>(–0.019)                  | 0.415<br>(0.410)                                   |
| F–Kr–Sb          | 0.060<br>(0.053)                     | 0.039<br>(0.043)                             | –0.019<br>(–0.013)                  | 0.476<br>(0.447)                                   |
| F–Kr–Bi          | 0.055<br>(0.047)                     | 0.066<br>(0.063)                             | –0.013<br>(–0.008)                  | 0.537<br>(0.507)                                   |
| F–Xe–As          | 0.079<br>(0.065)                     | –0.017<br>(0.017)                            | –0.031<br>(–0.018)                  | 0.337<br>(0.339)                                   |
| F–Xe–Sb          | 0.058<br>(0.052)                     | 0.013<br>(0.023)                             | –0.018<br>(–0.013)                  | 0.362<br>(0.353)                                   |
| F–Xe–Bi          | 0.052<br>(0.048)                     | 0.037<br>(0.041)                             | –0.012<br>(–0.009)                  | 0.417<br>(0.406)                                   |

**Table S8. Various Topological Properties at the Local Electron Energy Density Critical Points [(3,+1) HCP] for the FNgY (Ng = Kr and Xe; Y = As, Sb and Bi) Ions Calculated Using the B3LYP and MP2 Methods with B1 Basis Sets for FNgAs and FNgSb Molecules and B2 Basis Sets for FNgBi Molecules.**

| F–Ng Bond |         |              |           |           |                |                  |                            |
|-----------|---------|--------------|-----------|-----------|----------------|------------------|----------------------------|
| Molecules | Methods | $R_{F-Ng}^a$ | $R(F)^b$  | $R(Ng)^b$ | $E_{d(HCP)}^c$ | $\rho_{(HCP)}^d$ | $-E_{d(HCP)}/\rho_{(HCP)}$ |
| F–Kr–As   | B3LYP   | 2.144        | 0.992     | 1.152     | –0.009         | 0.078            | 0.116                      |
|           | MP2     | 2.078        | 0.964     | 1.114     | –0.022         | 0.092            | 0.233                      |
| F–Kr–Sb   | B3LYP   | 2.184        | 1.007     | 1.177     | –0.005         | 0.071            | 0.077                      |
|           | MP2     | 2.117        | 0.981     | 1.136     | –0.016         | 0.084            | 0.188                      |
| F–Kr–Bi   | B3LYP   | 2.220        | 0.979     | 1.241     | –0.005         | 0.067            | 0.077                      |
|           | MP2     | 2.158        | 0.949     | 1.209     | –0.012         | 0.080            | 0.157                      |
| F–Xe–As   | B3LYP   | 2.198        | 0.985     | 1.213     | –0.018         | 0.083            | 0.215                      |
|           | MP2     | 2.167        | 0.985     | 1.182     | –0.025         | 0.087            | 0.281                      |
| F–Xe–Sb   | B3LYP   | 2.227        | 0.993     | 1.234     | –0.014         | 0.078            | 0.185                      |
|           | MP2     | 2.176        | 0.982     | 1.194     | –0.025         | 0.088            | 0.280                      |
| F–Xe–Bi   | B3LYP   | 2.244        | 0.917     | 1.327     | –0.012         | 0.083            | 0.143                      |
|           | MP2     | 2.212        | 0.927     | 1.285     | –0.018         | 0.086            | 0.208                      |
| Ng–Y Bond |         |              |           |           |                |                  |                            |
| Molecules | Methods | $R_{Ng-Y}^a$ | $R(Ng)^b$ | $R(Y)^b$  | $E_{d(HCP)}^c$ | $\rho_{(HCP)}^d$ | $-E_{d(HCP)}/\rho_{(HCP)}$ |
| F–Kr–As   | B3LYP   | 2.545        | 1.275     | 1.270     | –0.017         | 0.069            | 0.251                      |
|           | MP2     | 2.490        | 1.256     | 1.234     | –0.025         | 0.077            | 0.327                      |
| F–Kr–Sb   | B3LYP   | 2.749        | 1.346     | 1.403     | –0.012         | 0.055            | 0.218                      |
|           | MP2     | 2.683        | 1.346     | 1.338     | –0.018         | 0.062            | 0.293                      |
| F–Kr–Bi   | B3LYP   | 2.839        | 1.401     | 1.438     | –0.008         | 0.048            | 0.167                      |
|           | MP2     | 2.766        | 1.411     | 1.355     | –0.013         | 0.055            | 0.232                      |
| F–Xe–As   | B3LYP   | 2.701        | 1.402     | 1.299     | –0.017         | 0.065            | 0.263                      |
|           | MP2     | 2.597        | 1.367     | 1.230     | –0.030         | 0.080            | 0.376                      |
| F–Xe–Sb   | B3LYP   | 2.907        | 1.475     | 1.432     | –0.012         | 0.053            | 0.230                      |
|           | MP2     | 2.859        | 1.471     | 1.388     | –0.017         | 0.058            | 0.295                      |
| F–Xe–Bi   | B3LYP   | 2.978        | 1.511     | 1.467     | –0.009         | 0.048            | 0.187                      |
|           | MP2     | 2.939        | 1.514     | 1.425     | –0.012         | 0.052            | 0.235                      |

<sup>a</sup>Calculated optimized bond length (Å) with aug-cc-pVTZ-PP basis set.

<sup>b</sup>Distance (Å) of the HCP from the atom in parentheses.

<sup>c</sup>Energy density (hartree  $a_0^{-3}$ ) at the HCP.

<sup>d</sup>Electron density ( $e a_0^{-3}$ ) at the HCP.
